# Supplementary material
Source: HighWire-hosted journal article supplement (http://molpharm.aspetjournals.org/highwire/filestream/76315/field_highwire_adjunct_files/2/FigureS2_NeuN_et_TfR_reduced.pdf)
Supplement: FigureS2_NeuN_et_TfR_reduced.pdf [file FigureS2_NeuN_et_TfR_reduced.pdf]

## **In vivo labeling of brain capillary endothelial cells following intravenous injection of monoclonal antibodies targeting the transferrin receptor**

Sarah Paris-Robidas, B.Sc., Vincent Emond, Ph.D., Cytia Tremblay, M.Sc., Denis Soulet, Ph.D., and Frédéric Calon, B.Pharm., Ph.D.

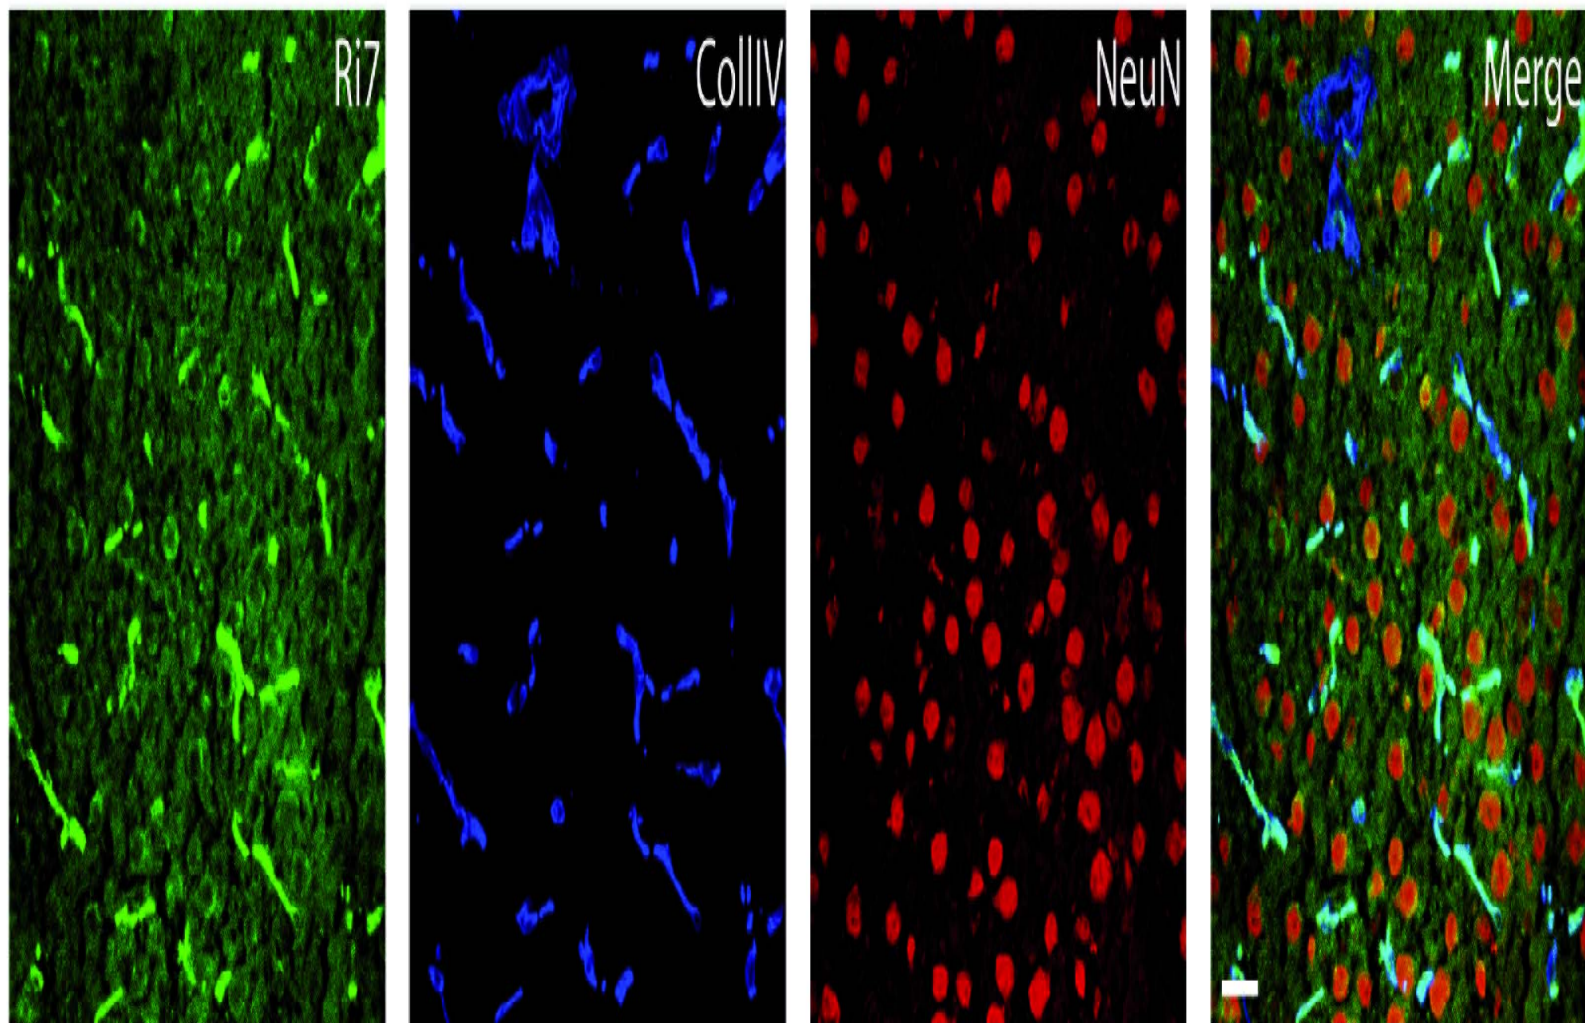

**Figure S2. Confirmation of the presence of TfR on both microvessels and neurons as measured with Ri7 immunohistofluorescence.** Confocal images showing representative results from two separate experiments of the localization of TfR (Ri7, green) on brain section from an untreated mice (n=3), compared to basal lamina of microvessels (collagen IV, blue) and neurons (NeuN, red). The overlay image to the right shows that TfR are found on both microvessels and neurons. Scale bar = 30  $\mu$ m
